# Supplementary material for: Sleep Quality and Stress Experienced with Quality of Life Among Nurses Working in Private Hospitals in Kathmandu, Nepal: A Cross-sectional Study
Source: Preprints.org preprint supplement (doi:10.20944/preprints202404.0981.v1), 2024-04-15
Supplement: Supplementary file 1 [file supplementary]

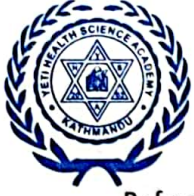

# YETI HEALTH SCIENCE ACADEMY

(Affiliated to Purbanchal University)

## Institutional Review Committee (IRC)

Kantimarga, Maharajgunj, Kathmandu, Nepal

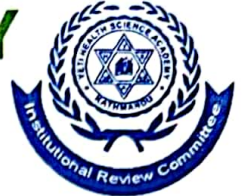

Ref no: 079/080/31

Date: 16 September 2022

To,  
Principal Investigator  
**Ms. Rajesh Karki**  
Yeti Health Science Academy,  
Maharajgunj, Kathmandu

**Ref: Approval of research proposal**

Dear Sir/Madam,

YHSA-IRC has reviewed your research Proposal entitled: -"Sleep quality, Stress and its Association with Quality of Life among Nurses of Tertiary Care Private Hospitals of Kathmandu Metropolitan: A Cross-Sectional Analytical Study"

As per the NHRC Ethical Guidelines and SOP of YHSA-IRC, this proposal falls under the preview of (Full Committee Review).

**Proposal ID No: 2079/080-150**

**Decision: APPROVED (FULL COMMITTEE REVIEW)**

**Recommended for period of 1 year (One year).**

**Suggestions:**

1. Strict compliance to the study proposal.
2. Resubmission of the proposal in case of deviation from the protocol within 7 days, if any.

**Please Note:**

- Inform YHSA-IRC immediately in case of any "Adverse events & serious adverse events."
- Inform YHSA-IRC immediately in case of any changes in study procedure, site and investigator.
- This permission is only for period mentioned above.
- Members of IRC have right to monitor the study with prior intimation.
- Prior permission of YHSA-IRC is required before publishing this research.
- Comply with relevant IRC guidelines.
- Abide by ethical conduct of the research.

If you have any questions, please contact the Institutional Review Committee at YHSA.

Thanking you

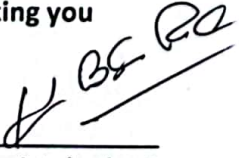  
Mr. Hari Bahadur Rana  
Chairperson

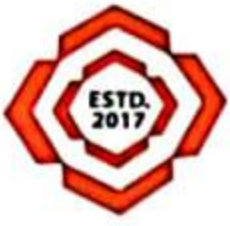

**NNH**  
NEPAL NATIONAL HOSPITAL

*where the patient comes first*

**NEPAL NATIONAL HOSPITAL**

Orange Building, Kalanki, Chowk

Kathmandu, Nepal

+977-01-5225101/103/202/204

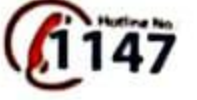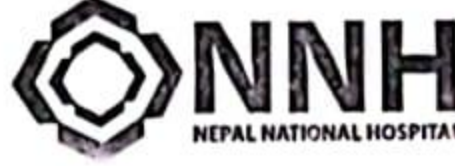

Date: 2022 06-05

Ref No: 195/2078/79

To WHOM IT MAY CONCERN

With reference to the request letter with Ref. No: 555/078/079, dated on: 2022 -05- 31 of Mr. Birat Raj Kafle, a student of B.P.H. eight semesters of National Open College (NOC), Sanepa, Lalitpur, Nepal, the hospital administration is approving and letting him conduct a study of his thesis aligning with the rules of this hospital.

DEPARTMENT OF ADMINISTRATION

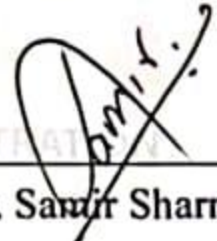  
Mr. Samir Sharma  
Hospital Manager



२०७८/०७९/१८७

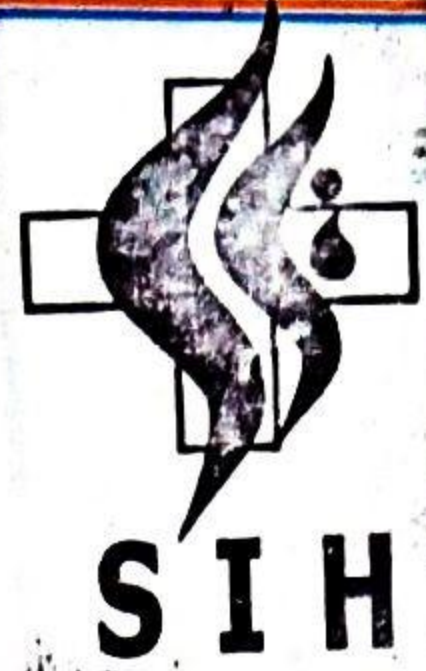

8 June 2022

To Whom It May Concern.

Ref : Approval for Data Collection .

This is to certify that the Management committee of Suvekchya International Hospital, Nagarjun-04, Kathmandu has approved following research to be conducted by **Mr Birat Raj Kafle** student of National Open College ( Pokhara University) the faculty of Health Sciences ( Bachelor in Public Health ).

Research Title: "Sleep quality, Stress and its Association with Quality of Life among Nurses of Tertiary Care Hospital : An Analytical Cross-Sectional Study."

  
Dr Hom Prasad Adhikari  
Chief Executive Officer



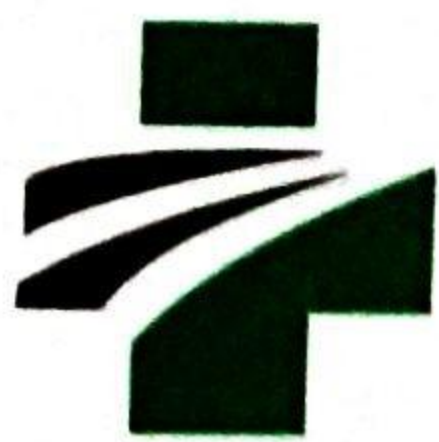

**GREEN CITY**  
HOSPITAL  
ग्रीन सिटी हस्पिटल

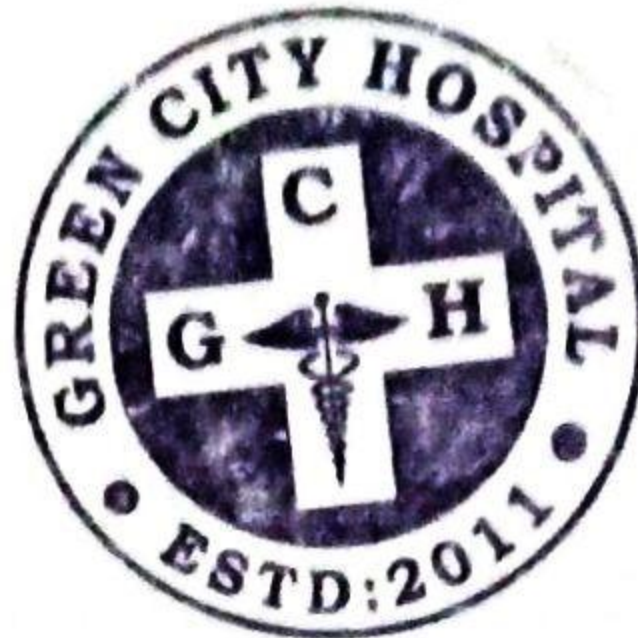

Registration No.: 86389/068/069  
Tokha-7, Basundhara  
Kathmandu, Nepal  
Tel: +977-1-4981133, 4983169  
4952248 (Direct line), 4957452  
E-mail: info@gch.com.np  
Web: www.gch.com.np

7<sup>th</sup> June 2022

**To whom it may concern**

**Subject: Approval for the Research Project.**

This is to inform you that the Administration Board of the Green City Hospital has approved the following Research to be conducted by **Mr. Birat Raj Kafle**, student of Bachelor of Public Health (BPH) at National Open College, at our Hospital.

Research Title: "Sleep- quality, stress & its association with quality of life among nurses of tertiary care hospital of Kathmandu district,: An analytical cross-sectional study "

*Manish Dabadi*

.....  
Manish Dabadi  
Senior Hospital Manager  
**SENIOR HOSPITAL MANAGER**  
**Green City Hospital**
